# Supplementary material for: Enhancement of dye-sensitized solar cells using Zr/N-doped TiO2 composites as photoelectrodes
Source: Royal Society of Chemistry journal article supplement (doi:10.1039/c4ra00194j), 2014-01-01
Supplement: c4ra00194j1.pdf [file c4ra00194j1.pdf]

ASSOCIATED CONTENT

Supporting Information.

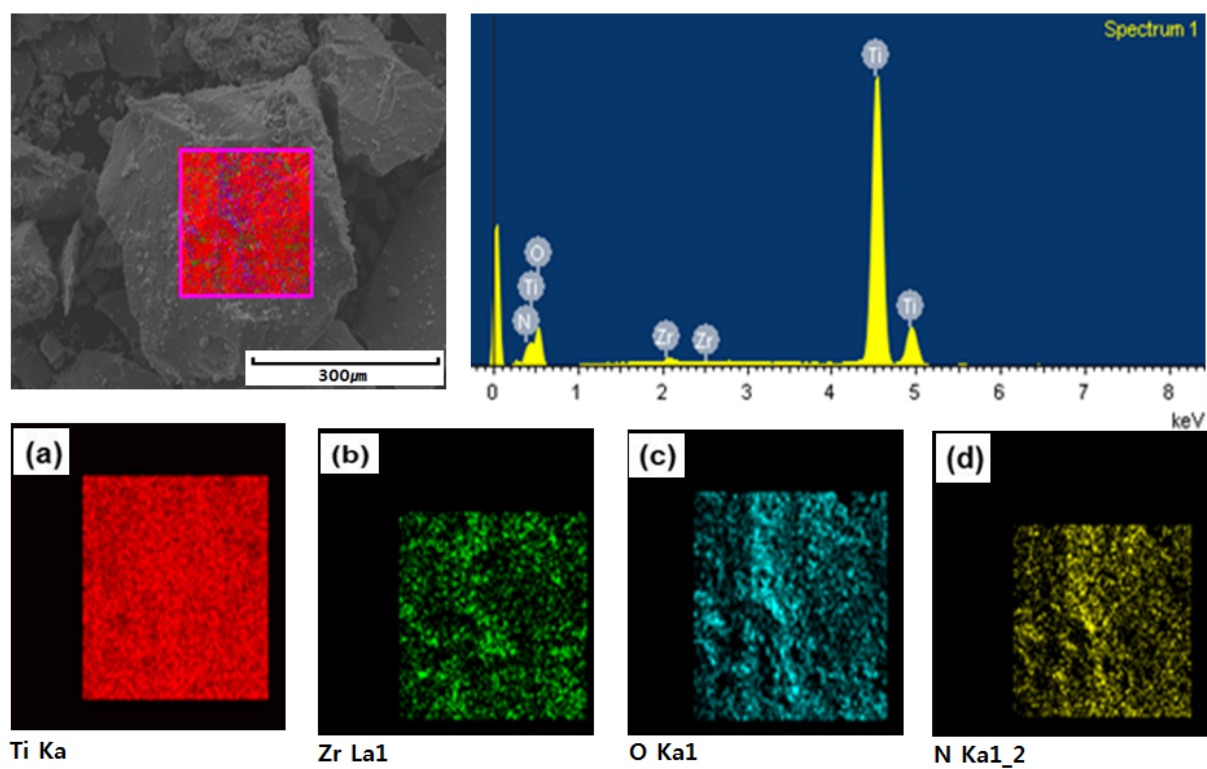

**Figure S1.** FE-SEM images of 0.01 M Zr/N-doped TiO<sub>2</sub> nanoparticles (a), EDS spectra (b), and elemental mapping for rectangular area indicated in (a) (c-f).

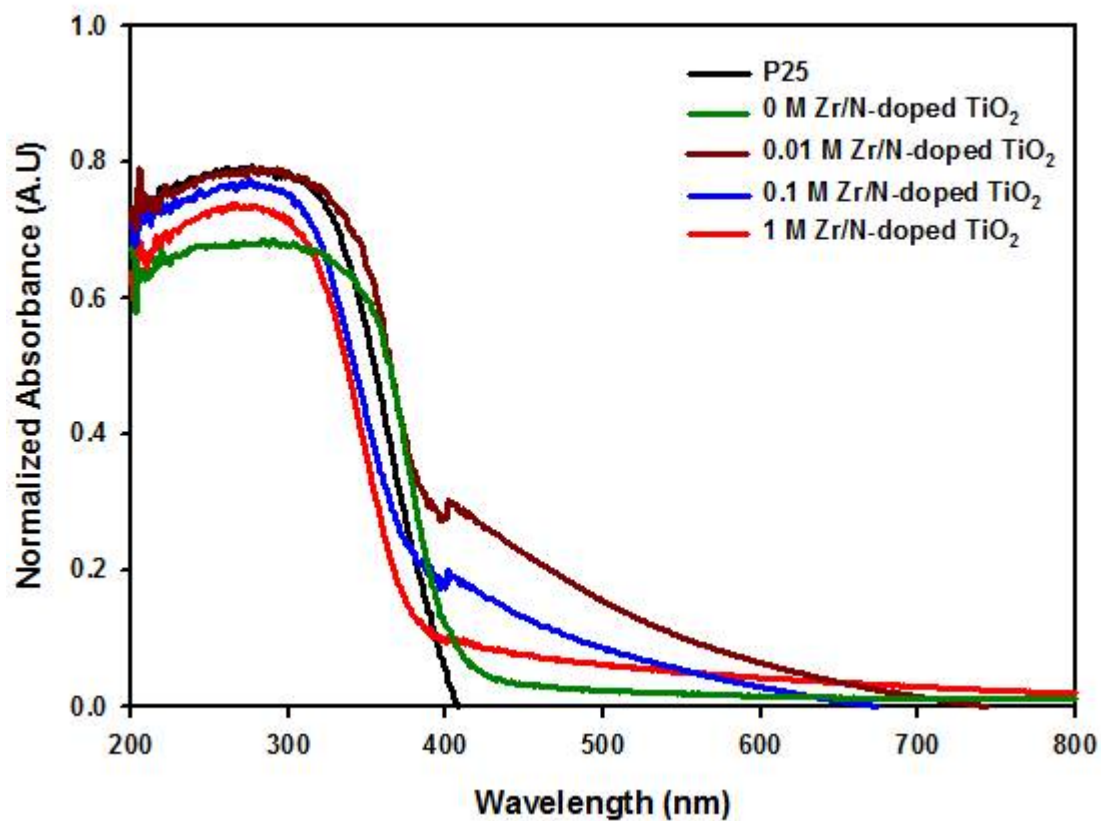

**Figure S2.** UV-vis absorption spectra of the P25 and various Zr/N-doped TiO<sub>2</sub> nanoparticles.

To compare the optical responses of the synthesized nanoparticles, their UV-vis absorption spectra were determined. Upon the introduction of Zr, a noticeable shift of the absorption spectra toward the visible-light region was observed. This indicates that the Zr/N-doped TiO<sub>2</sub> nanoparticles have strong optical responses under visible light irradiation.

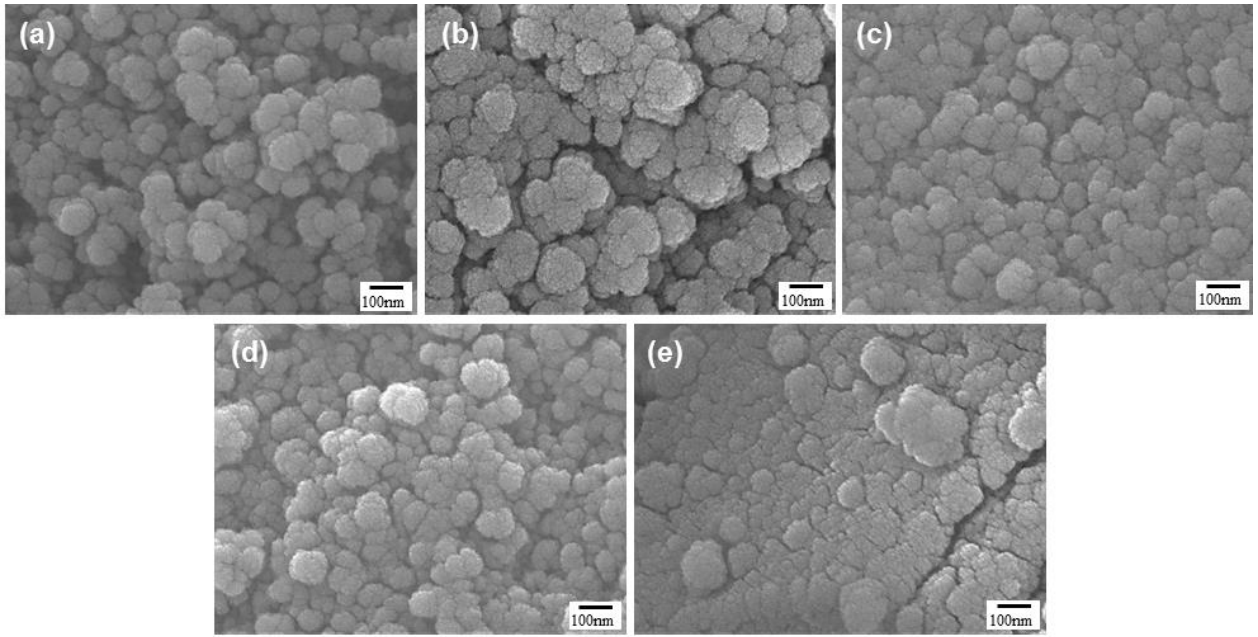

**Figure S3.** FE-SEM images of P25 nanoparticles (a) and the synthesized Zr/N-doped TiO<sub>2</sub> nanoparticles with Zr contents of 0 M (b), 0.01 M (c), 0.1 M (d), and 1 M (e).

The synthesized Zr/N-doped TiO<sub>2</sub> and P25 nanoparticles show highly aggregated shapes. The addition of Zr decreased the sizes of the nanoparticles.
